# Supplementary material for: Gene Regulation by H-NS as a Function of Growth Conditions Depends on Chromosomal Position in Escherichia coli
Source: PubMed Central journal article supplement (PMC4390576; doi:10.1534/g3.114.016139), 2015-02-19
Supplement: supp_g3.114.016139_FigureS5.pdf [file supp_g3.114.016139_FigureS5.pdf]

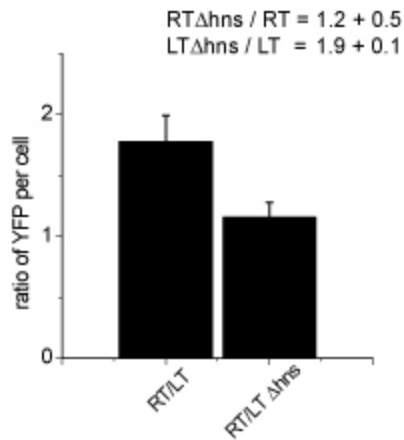

**Figure S5** The difference between RT and LT is lost in a  $\Delta hns$  background. The bar graph shows the ratio between the average YFP per cell for the RT and LT insertions in a WT background and  $\Delta hns$  background. Data were obtained by flow cytometry for cells in exponential phase growing in 0.5% casamino acids at 37°C in flasks, shaking. Error bars represent the standard deviation for four independent experiments. The ratio between the fluorescence in RT and LT becomes closer to 1 in the  $\Delta hns$  background with respect to the ratio in the wild type background. This is due to a stronger increase in fluorescence for the LT position in absence of H-NS with respect to the slight increase of fluorescence for RT position in the  $\Delta hns$  background.
